# Supplementary figures and images for: An mRNA vaccine encoding Chikungunya virus E2-E1 protein elicits robust neutralizing antibody responses and CTL immune responses
Source: PubMed Central journal article supplement — Virol Sin. 2022 Jan 28;37(2):266–76. doi: 10.1016/j.virs.2022.01.032 (PMC9170975; doi:10.1016/j.virs.2022.01.032), 2022-01-28

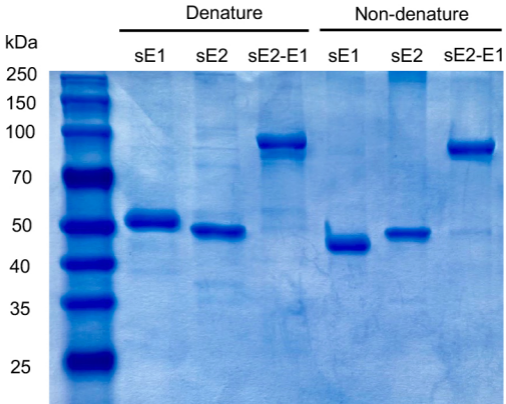

Supplement: mmc2.pdf [file mmc2.pdf]
